# Supplementary material
Source: PubMed Central journal article supplement (PMC6372347)
Supplement: NIHMS1005013-supplement-supplmental_figures.pdf [file NIHMS1005013-supplement-supplmental_figures.pdf]

## **SUPPORTING INFORMATION**

### **Singular Value Decomposition Method To Determine Distance Distributions In Pulsed Dipolar Electron Spin Resonance: II. Estimating Uncertainty**

*Madhur Srivastava<sup>1,2</sup> and Jack H. Freed<sup>1,3\*</sup>*

<sup>1</sup>National Biomedical Center for Advanced ESR Technology, Cornell University, Ithaca, NY 14853, USA

<sup>2</sup>Meinig School of Biomedical Engineering, Cornell University, Ithaca, NY 14853, USA

<sup>3</sup>Department of Chemistry and Chemical Biology, Cornell University, Ithaca, NY 14853, USA

\*Corresponding Author: [jhf3@cornell.edu](mailto:jhf3@cornell.edu)

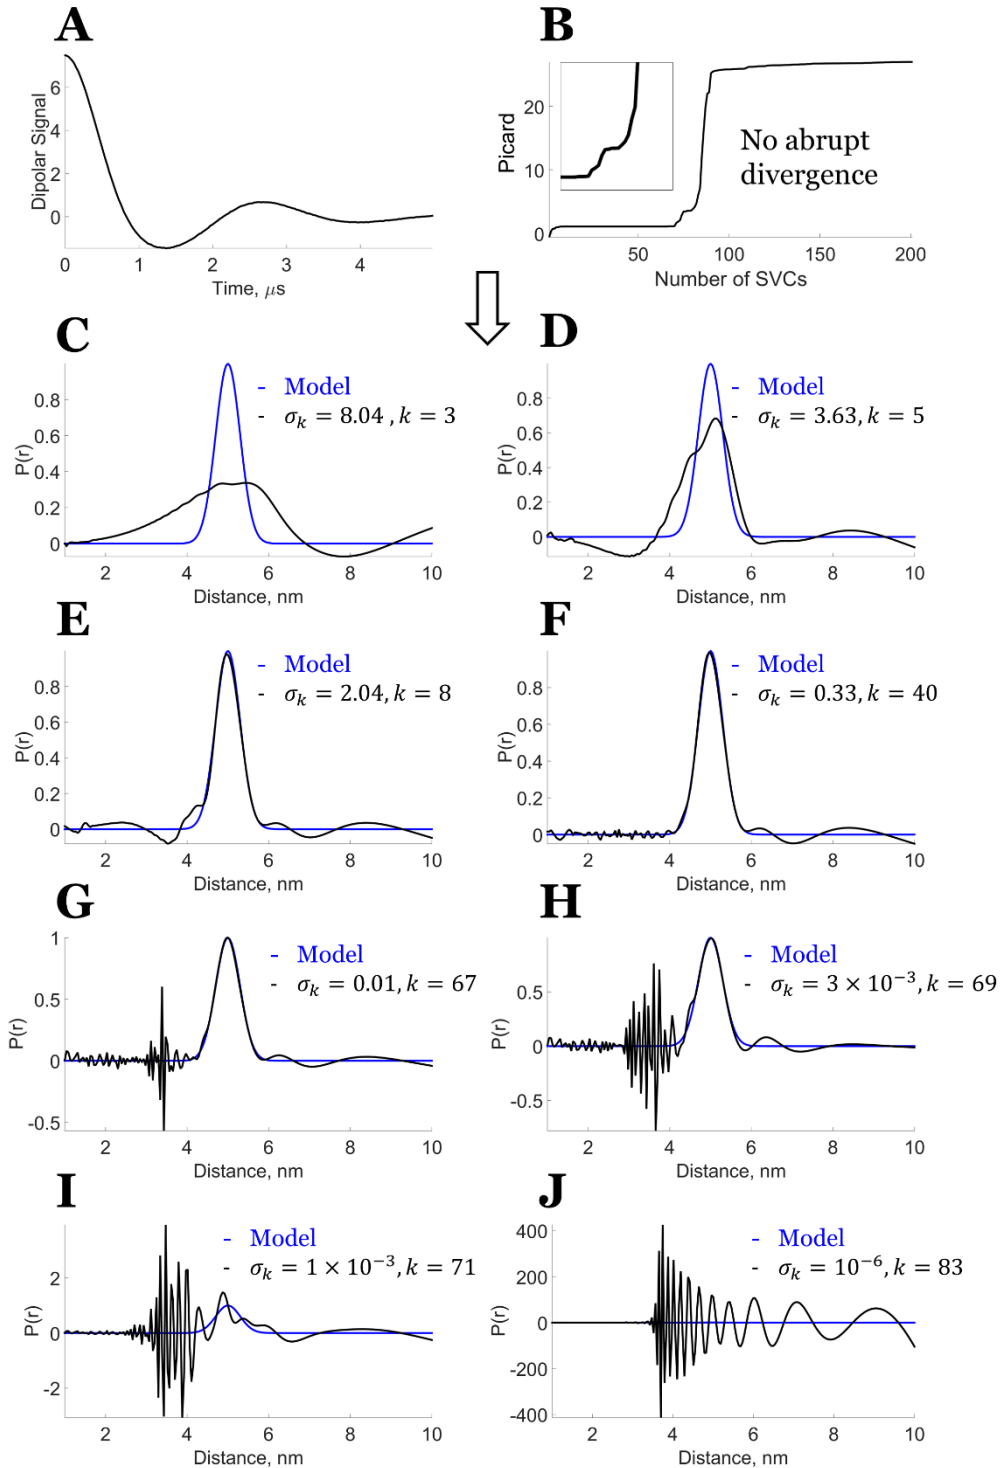

**Figure S1:** Model Data with Some Noise ( $SNR \approx 850$ ) -- Unimodal Distance Distribution. **A)** Noisy model data dipolar signal; **B)** Picard plot of the unimodal distribution from the noisy model data at different number of Singular Value Contributions (SVCs) represented by  $i$ , the enlarged inset covers SVCs from 55 to 90; and **C)** to **J)** Comparison of model distribution with the distance distribution generated

from: **C)**  $k = 3$ ,  $\sigma_k = 8.04$ ; **D)**  $k = 5$ ,  $\sigma_k = 3.63$ ; **E)**  $k = 8$ ,  $\sigma_k = 2.04$ ; **F)**  $k = 40$ ,  $\sigma_k = 0.33$ ; **G)**  $k = 67$ ,  $\sigma_k = 0.01$ ; **H)**  $k = 69$ ,  $\sigma_k = 3 \times 10^{-3}$ ; **I)**  $k = 71$ ,  $\sigma_k = 1 \times 10^{-3}$ ; and **J)**  $k = 83$ ,  $\sigma_k = 10^{-6}$ . (Figure S1 is reprinted with permission from ref 7. Copyright 2017 ACS.)

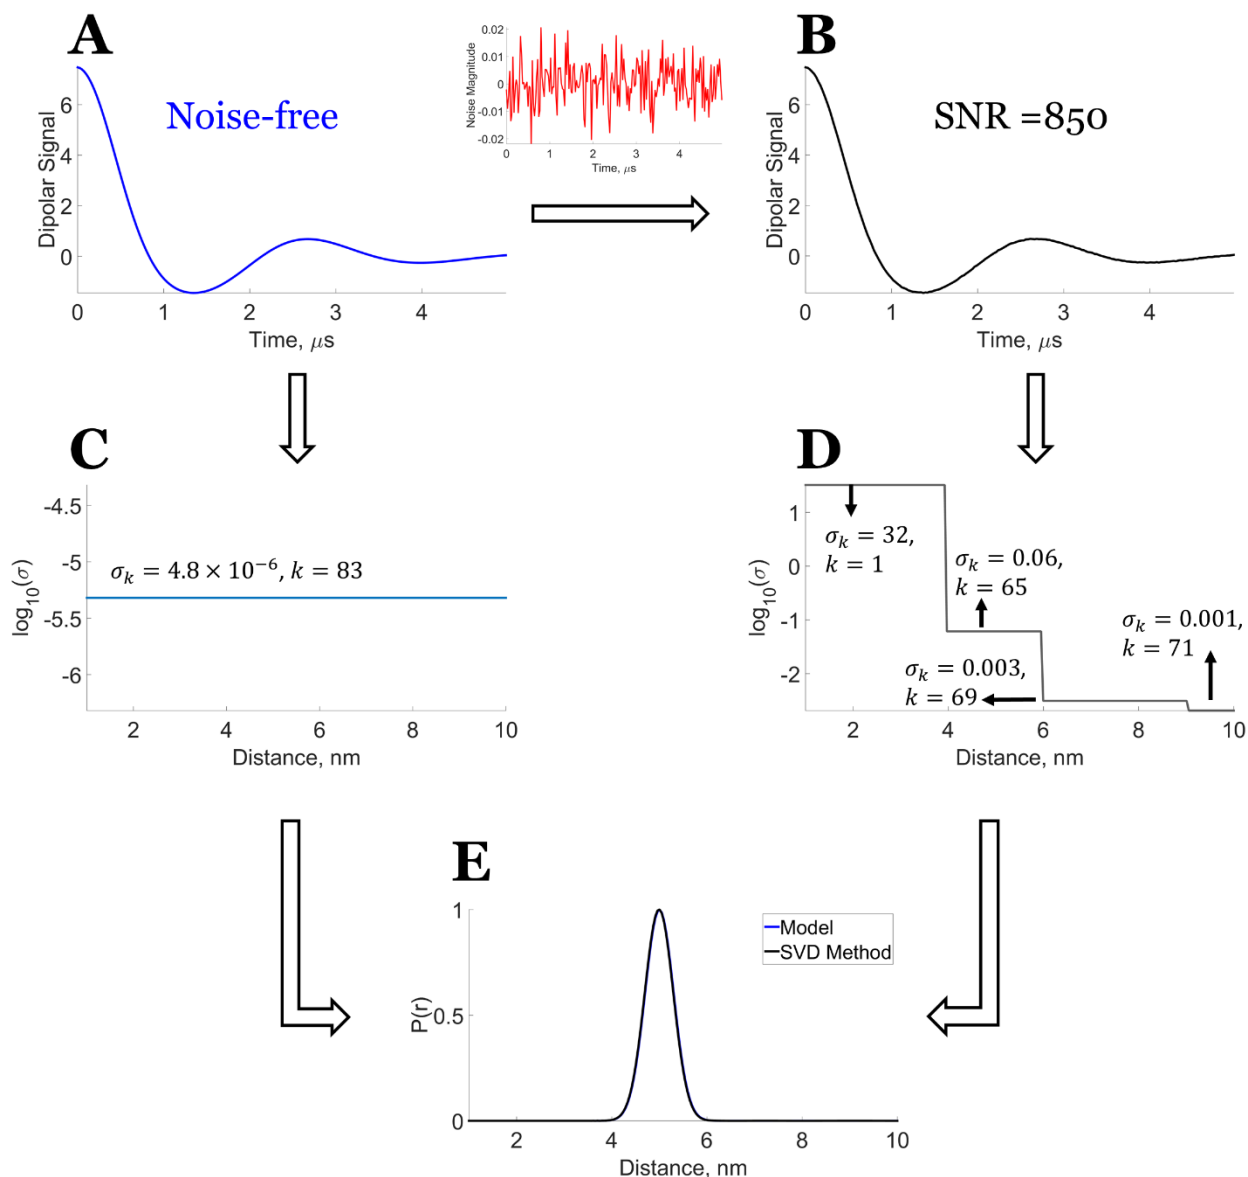

**Figure S2:** Unimodal Model -- Reconstruction of distance distribution for noise-free model data and noisy model data ( $SNR \approx 850$ ) using the new SVD method. **A)** Model dipolar signal; **B)** Model dipolar signal with added noise (see added noise in Red plot); **C)** Singular value cut-off at each distance ( $nm$ ) for the model dipolar signal; **D)** Singular value cut-off at each distance ( $nm$ ) for the model dipolar signal with added noise; and **E)** Distance distribution reconstructed from the model dipolar signal and model dipolar signal with noise using the singular value cut-offs shown in **C)** and **D)**, respectively. Note that the added noise is so small that **A** and **B** still appear identical, but convergence to the virtually identical final results requires segmentation in the latter case. (Figure S2 is reprinted with permission from ref 7. Copyright 2017 ACS.)
